# Supplementary material for: Development and Validation of a Psoriasis Treatment Acceptability Measure through Group Concept Mapping
Source: Research Square preprint supplement (doi:10.21203/rs.3.rs-1236500/v1), 2022-01-12
Supplement: Supplementary file 1 [file 44cb28418fcab791b841ec91.docx]

**Psoriasis Manuscript Appendix 2**

**Treatment Acceptability Questionnaire (TAQ)**

Instructions:

The following statements describe features that an ideal treatment would have. Please rate the statements based on **importance** for the treatment of **your** psoriasis.

Response Options:

o Not at all important (0)

o Somewhat important (1)

o Moderately important (2)

o Extremely important (3)

| **GCM Source** | **Item Number** | **Statement** |
| --- | --- | --- |
| Study 1 | TAQ1 | Clear symptoms that are visible* |
| Study 1 | TAQ2 | Be effective in treating psoriasis for skin and other areas* |
| Study 1 | TAQ3 | Be safe for long term use |
| Study 1 | TAQ4 | Not lose effectiveness over time* |
| Study 1 | TAQ5 | Safe to take with other medications* |
| Study 1 | TAQ6 | Be easy to include in your (a patient's) normal routine* |
| Study 1 | TAQ7 | Be simple and quick to administer |
| Study 1 | TAQ8 | Be painless to use |
| Study 1 | TAQ9 | Have an alternate to injections |
| Study 2 | TAQ10 | Relieve the itching* |
| Study 2 | TAQ11 | Have little to no side effects |
| Study 2 | TAQ12 | Prevent symptoms from coming back* |
| Study 2 | TAQ13 | Be easy to apply to all areas which need treatment |
| Study 2 | TAQ14 | Prevent psoriasis build-up on my scalp* |
| Study 2 | TAQ15 | Be effective using once to twice weekly |
| Study 2 | TAQ16 | Absorb invisibly in my skin |
| Study 2 | TAQ17 | Be gentle enough to use daily without damaging my hair |
| Study 2 | TAQ18 | Work internally to prevent itching* |
| Study 2 | TAQ19 | Be a pill for long term use |
| Study 1 | TAQ20 | Be an injection* |

*Wording modified from original statement based on survey feedback
